# Supplementary material for: Prebiotic Phosphorylation of Uridine using Diamidophosphate in Aerosols
Source: PubMed Central journal article supplement (PMC6753121; doi:10.1038/s41598-019-49947-8), 2019-09-19
Supplement: 41598_2019_49947_MOESM1_ESM.pdf [file 41598_2019_49947_MOESM1_ESM.pdf]

# Prebiotic Phosphorylation of Uridine using Diamidophosphate in Aerosols

A. D. Castañeda<sup>1</sup>, Z. Li<sup>1</sup>, T. Joo<sup>2</sup>, K. Benham<sup>1</sup>, B. T. Burcar<sup>1</sup>, R. Krishnamurthy<sup>3</sup>, C. L. Liotta<sup>1</sup>, N. L. Ng<sup>4,2\*</sup>, and T. M. Orlando<sup>1\*</sup>

<sup>1</sup>School of Chemistry and Biochemistry, Georgia Institute of Technology, Atlanta, GA, 30332, USA

<sup>2</sup>School of Earth and Atmospheric Sciences, Georgia Institute of Technology, Atlanta, GA, 30332, USA

<sup>3</sup>Department of Chemistry, The Scripps Research Institute, La Jolla, CA, 92037, USA

<sup>4</sup>School of Chemical and Biomolecular Engineering, Georgia Institute of Technology, Atlanta, GA, 30332, USA

\*Correspondance and requests for materials should be addressed to T.M.O. (email: [thomas.orlando@chemistry.gatech.edu](mailto:thomas.orlando@chemistry.gatech.edu)) or N.L.N. (email: [ng@chbe.gatech.edu](mailto:ng@chbe.gatech.edu))

## Supplementary Information

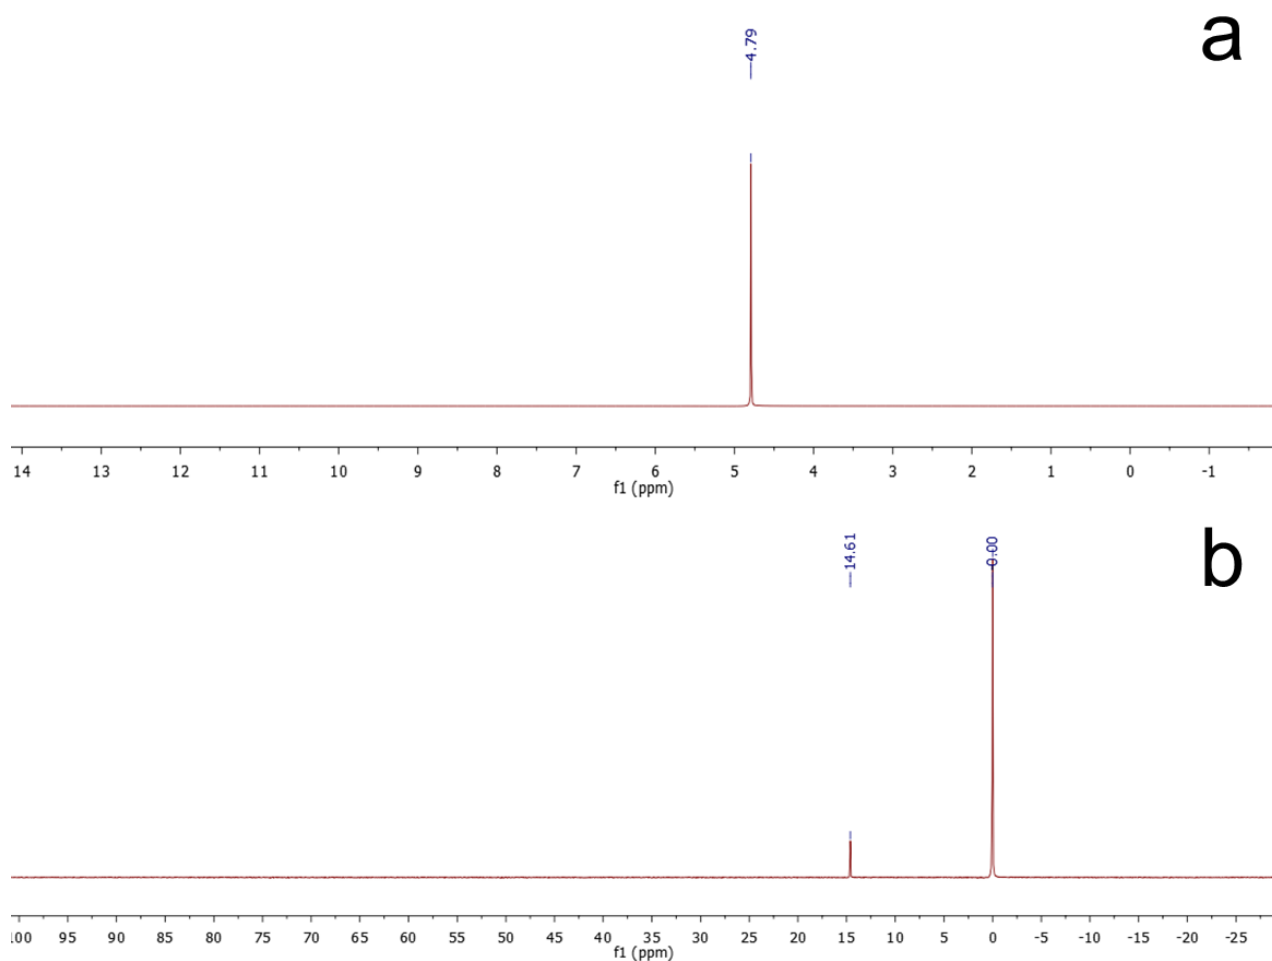

**Figure S1.** (a) 400 MHz  $^1\text{H}$  NMR spectrum of 0.1 M DAP in  $\text{D}_2\text{O}$ . (b) 160 MHz  $\{^1\text{H}$ -decoupled+NOE $\}^{31}\text{P}$  NMR spectrum of 0.1 M DAP in  $\text{D}_2\text{O}$  using 85%  $\text{H}_3\text{PO}_4$  (in a sealed 1 mm capillary) as internal standard (chemical shift = 0 ppm).

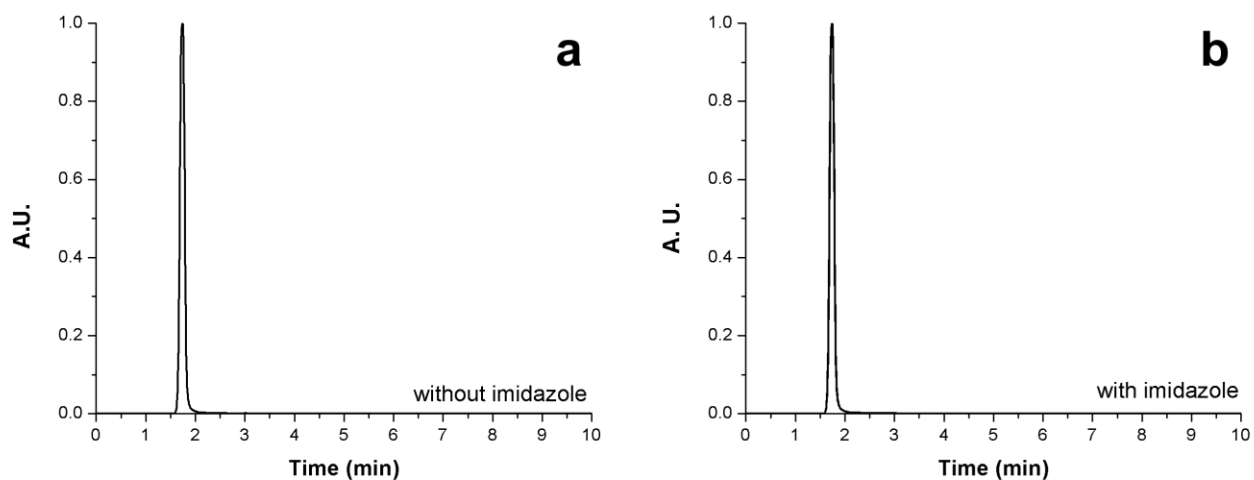

**Figure S2.** LC chromatograms of stock solutions consisting of 1 eq Uridine + 5 eq DAP+ 3 eq MgCl<sub>2</sub>, pH adjusted to 5.5 (a) without and (b) with the addition of 1 eq imidazole. No product formation is observed.

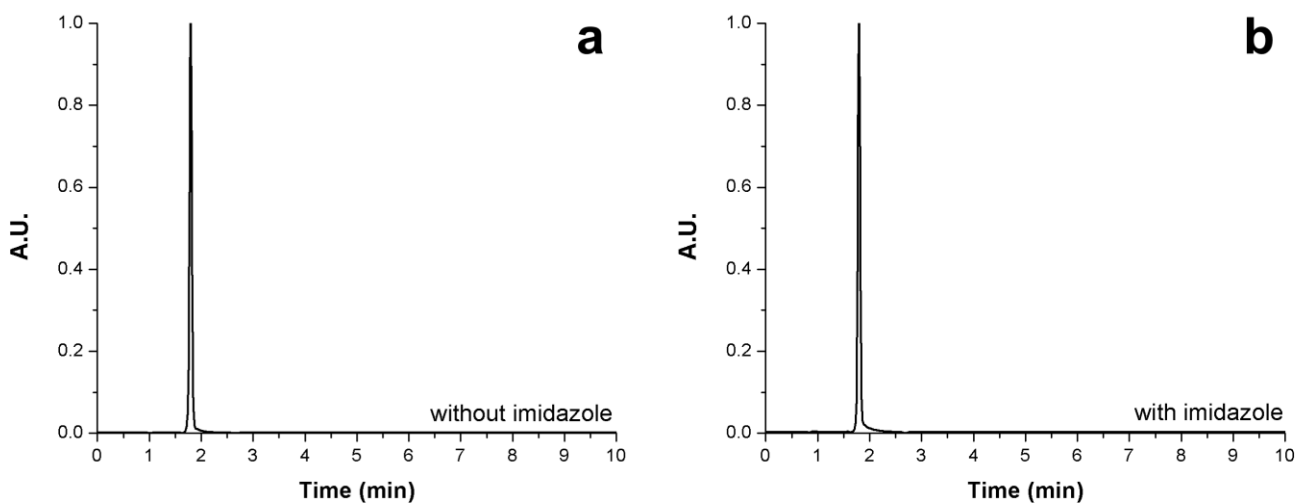

**Figure S3.** LC chromatograms of reconstituted stock solution (1 eq Uridine + 5 eq DAP+ 3 eq MgCl<sub>2</sub>, pH adjusted to 5.5) after 100  $\mu$ L is dried down at R.T. on the filter surface for 50 min. 100  $\mu$ L of H<sub>2</sub>O was used to reconstitute the compounds. (a) without imidazole. (b) with the addition of 1 eq imidazole. No product was observed in either case.

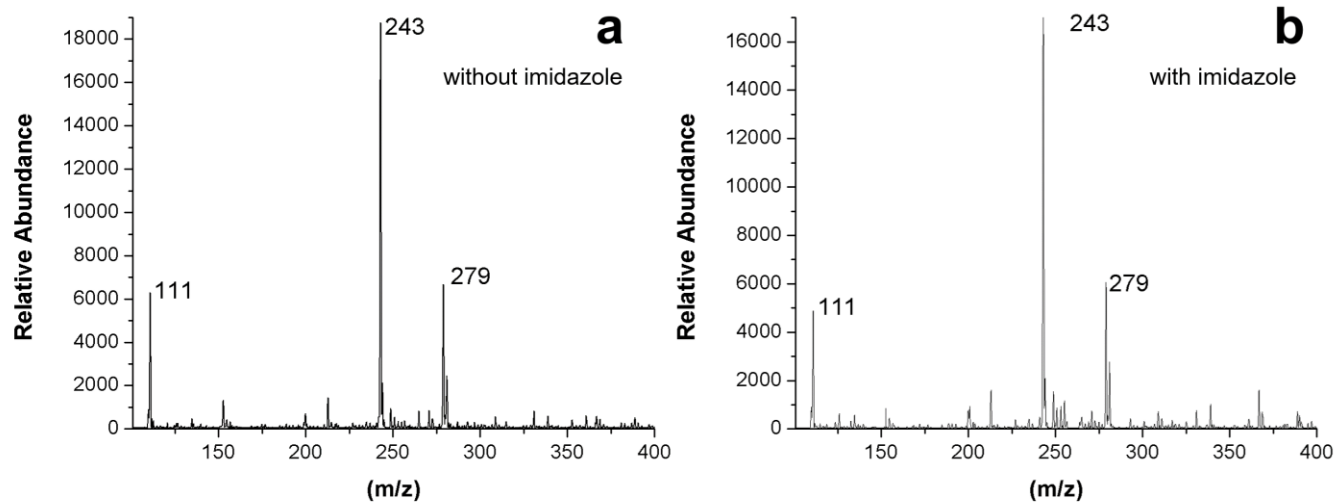

**Figure S4.** Direct Inject (no chromatography separation) ESI-MS of 1 eq Uridine + 5 eq DAP+ 3 eq MgCl<sub>2</sub>, pH adjusted to 5.5 (a) without and (b) with addition of imidazole. No peaks corresponding to 2',3'-cUMP are observed in either case.
